# Supplementary material
Source: PubMed Central journal article supplement (PMC3362093)
Supplement: supp_00519.2011_table_legends.pdf [file supp_00519.2011_table_legends.pdf]

## SUPPLEMENTAL MATERIAL LEGENDS

### SUPPLEMENTAL TABLES LEGENDS

**Supplemental Table 1: Genes enriched specifically in Sox9-EGFP Low ISCs.** Lists 164 genes that were significantly up-regulated in Sox9-EGFP Low ISCs *vs.* all other FACS-isolated Sox9-EGFP cell types. Fold change is expressed relative to gene expression in Sox9-EGFP Negative cells (n=7, **ID:** Entrez Gene ID).

**Supplemental Table 2: Genes enriched specifically in Sox9-EGFP Sublow progenitors.** Lists 290 genes that were significantly up-regulated in Sox9-EGFP Sublow progenitors *vs.* all other FACS-isolated Sox9-EGFP cell types. Fold change is expressed relative to gene expression in Sox9-EGFP Negative cells (n=7, **ID:** Entrez Gene ID).

**Supplemental Table 3: Genes regulated by irradiation specifically in Sox9-EGFP Low cells.** Lists 567 genes whose expression was significantly regulated by irradiation **exclusively** in Sox9-EGFP Low cells. Fold change represents gene expression in Sox9-EGFP Low cells isolated from mice at day 5 post-irradiation *vs.* Sox9-EGFP Low cells isolated from non-irradiated mice (n=3-7, **ID:** Entrez Gene ID).

**Supplemental Table 4: Genes regulated by irradiation specifically in Sox9-EGFP Sublow cells.** Lists 933 genes whose expression was significantly regulated by irradiation **exclusively** in Sox9-EGFP Sublow progenitors. Fold change in gene expression in Sox9-EGFP Sublow progenitors isolated from mice at day 5 post-irradiation is expressed relative to gene expression in Sox9-EGFP Sublow cells from non-irradiated mice (n=3-7, **ID:** Entrez Gene ID).

**Supplemental Table 5: Genes regulated by irradiation specifically in Sox9-EGFP High cells.** Lists 2,071 genes whose expression was significantly regulated by irradiation **exclusively** in Sox9-EGFP High cells. Fold change represents gene expression in Sox9-EGFP High cells isolated from mice at day 5 post-

irradiation vs. gene expression in Sox9-EGFP High cells from non-irradiated mice (n=3-7, **ID**: Entrez Gene ID).

**Supplemental Table 6: Major cellular functions and associated genes regulated by irradiation specifically in Sox9-EGFP High cells.** IPA analysis of the 2,071 genes which were regulated by irradiation specifically in Sox9-EGFP High cells revealed that 199 genes were related to the regulation of cell cycle (red), that 108 genes were involved to cellular assembly and organization (green) and that 166 genes were related to DNA replication, recombination and repair process (blue).
